# Supplementary material for: Dual fluorescent zwitterionic organogels of a quinoxalinone derivative using cation–anion detection keys
Source: Royal Society of Chemistry journal article supplement (doi:10.1039/c7tc01242j), 2017-01-01
Supplement: c7tc01242j1.pdf [file c7tc01242j1.pdf]

# Dual Fluorescent Zwitterionic Organogel of a Quinoxalinone Derivative using Cation–Anion Detection Keys

Yuta Nakane, Takashi Takeda, Norihisa Hoshino, Ken-ichi Sakai, and Tomoyuki Akutagawa

## Contents

1. NMR, Mass, and IR spectra of **1** (Figure S1).
2. Atomic numbering scheme of single crystal  $\text{K}^+\cdot\mathbf{1}\cdot\text{PF}_6^-$  (Figure S2).
3. Packing structure of  $\text{K}^+\cdot\mathbf{1}\cdot\text{PF}_6^-$  (Figure S3).
4. Atomic numbering scheme of single crystal  $\text{TBA}^+\cdot\mathbf{1}\cdot(\text{H}_2\text{O})_2$  (Figure S4).
5. Packing structure of  $\text{TBA}^+\cdot\mathbf{1}\cdot(\text{H}_2\text{O})_2$  (Figure S5).
6. HOMO and LUMO orbitals of **1** based on DFT calculations (Figure S6).
7. Absorption and fluorescence spectra of **1** by the addition of  $\text{K}^+$  ion in  $\text{CH}_3\text{CN}$  (Figure S7).
8.  $^1\text{H}$  NMR titration curve by the addition of  $\text{K}^+$  ions (Figure S8).
9. Absorption and fluorescence spectra of **1** by the additions of  $\text{F}^-$  and  $\text{AcO}^-$  (Figure S9).
10. Fitting curves of the two steps  $\text{F}^-$  and  $\text{AcO}^-$  recognitions processes (Figure S10).
11. Fluorescence spectra of  $\text{K}^+\cdot\mathbf{1}$  by the addition of  $\text{AcO}^-$  anion (Figure S11).
12. Fluorescence titration spectra of  $\text{K}^+\cdot\mathbf{1}$  by the addition of  $\text{AcO}^-$  anion (Figure S12).
13. Fitting curve of the two-steps successive anion recognition of  $\text{K}^+\cdot\mathbf{1}$  in  $\text{CH}_3\text{CN}$  (Figure S13).
14. Changes in the UV-vis spectra of  $\mathbf{1}^-$  anion by the addition of  $\text{K}^+$  (Figure S14)
15. Fitting curve of  $\text{K}^+$  binding constant at [18]crown-6 unit of anionic  $\mathbf{1}^-$  using the 1:1 complex formation model (Figure S14).
16. Determination of two-steps complex formation constants.

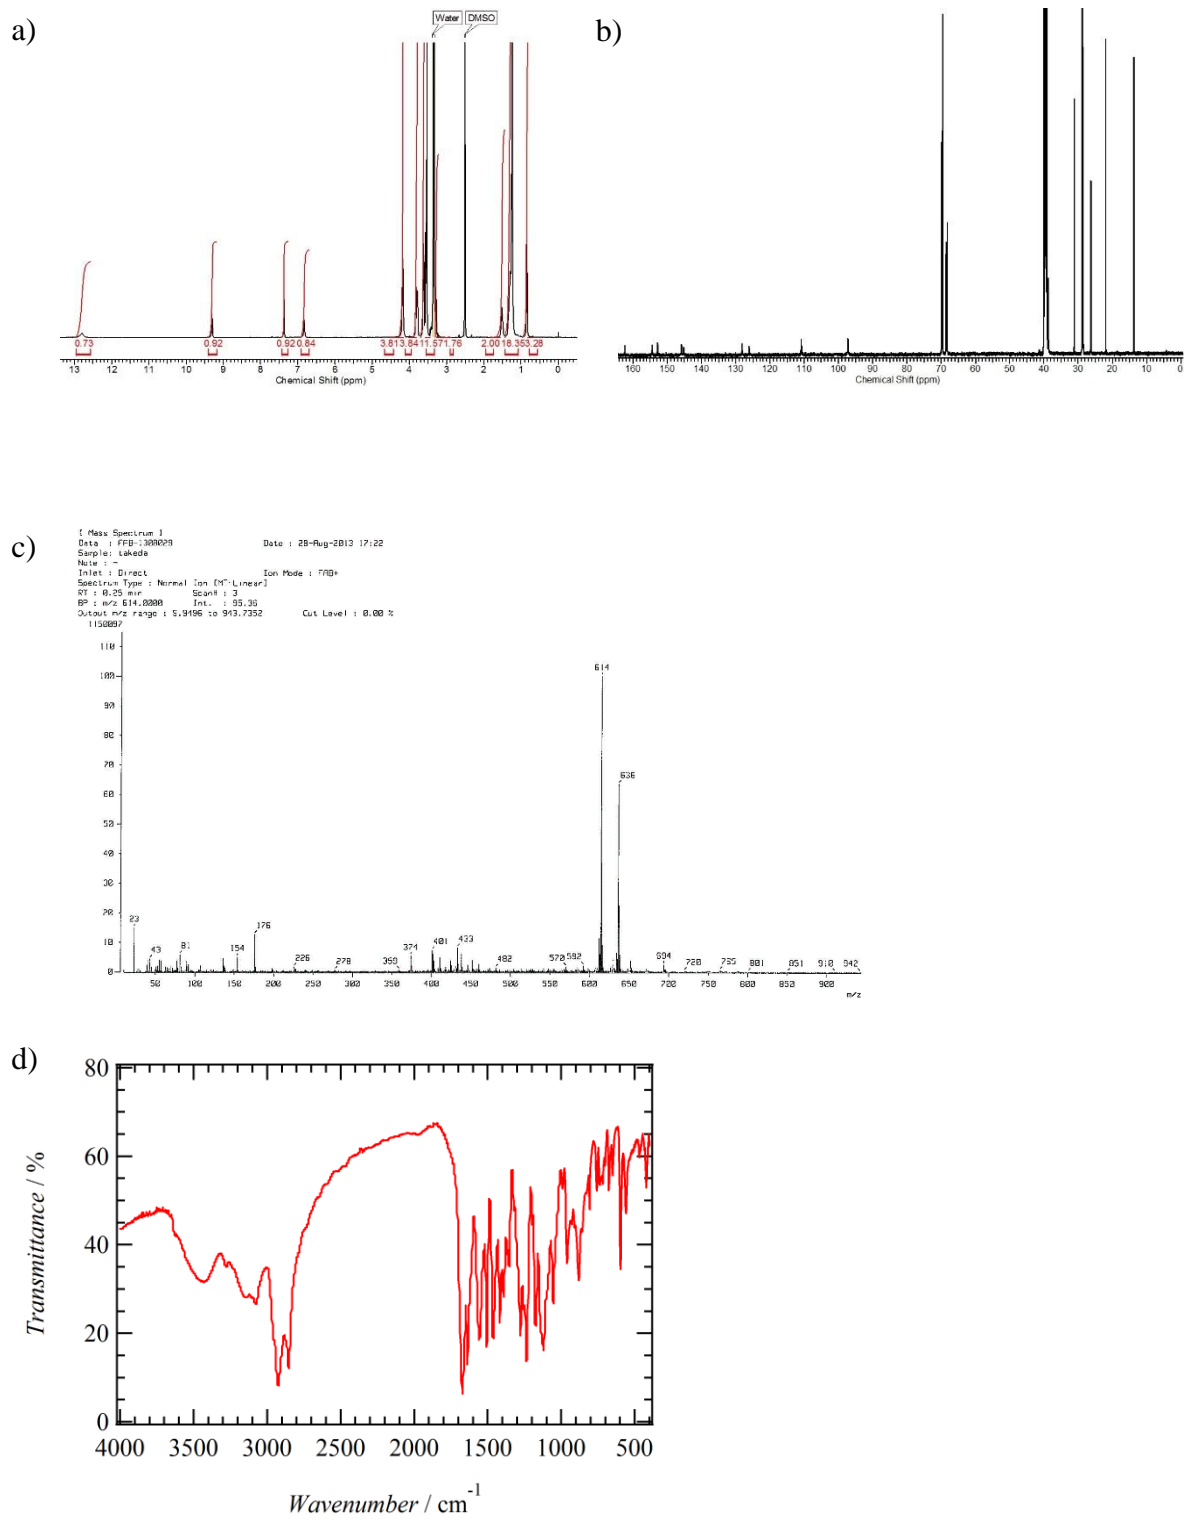

**Figure S1.** Characterization of **1**. a)  $^1\text{H}$  NMR, b)  $^{13}\text{C}$  NMR, c) Mass, and d) IR spectra of **1**.

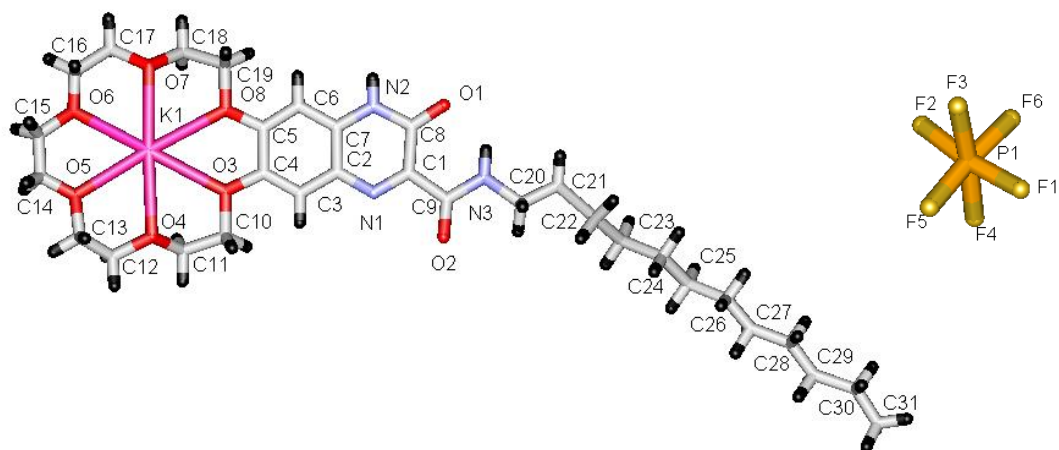

**Figure S2.** Atomic numbering scheme of single crystal  $\text{K}^+\cdot\mathbf{1}\cdot\text{PF}_6^-$ .

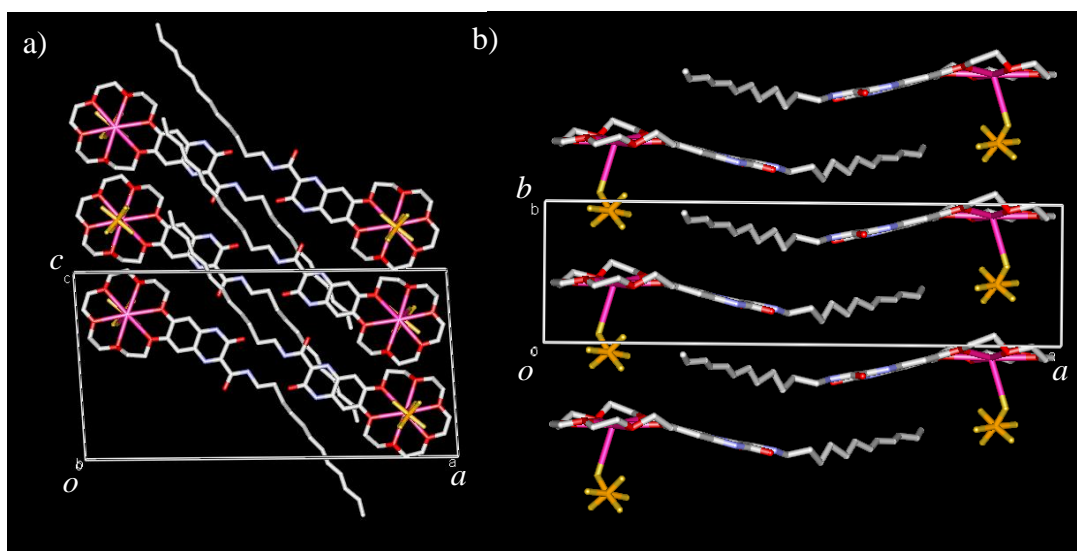

**Figure S3.** Unit cells of  $\text{K}^+\cdot\mathbf{1}\cdot\text{PF}_6^-$  viewed a) along the  $b$  and b) along the  $c$  axis.

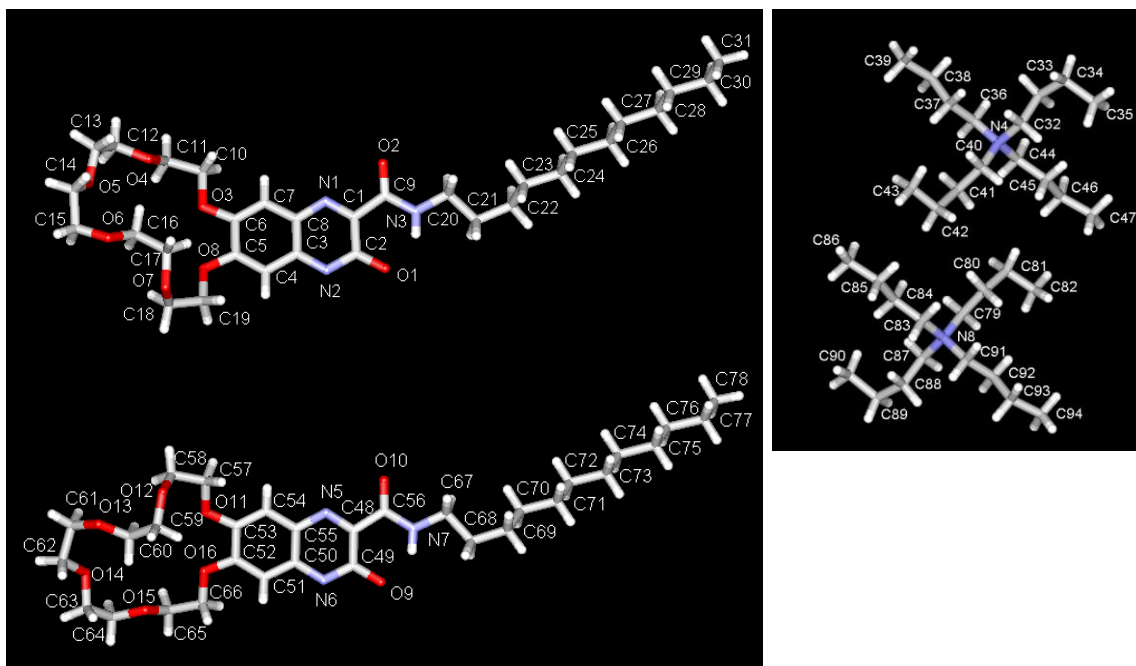

**Figure S4.** Atomic numbering scheme of single crystal  $\text{TBA}^+\cdot\mathbf{1}\cdot(\text{H}_2\text{O})_2$ .

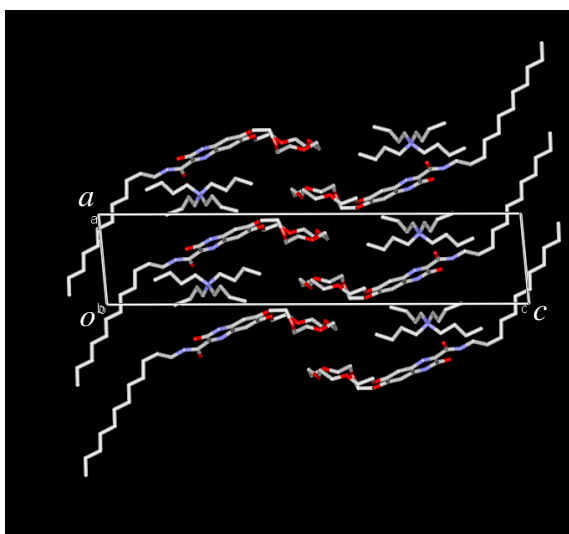

**Figure S5.** Packing structure of  $\text{TBA}^+\cdot\mathbf{1}\cdot(\text{H}_2\text{O})_2$  viewed along the  $b$  axis.

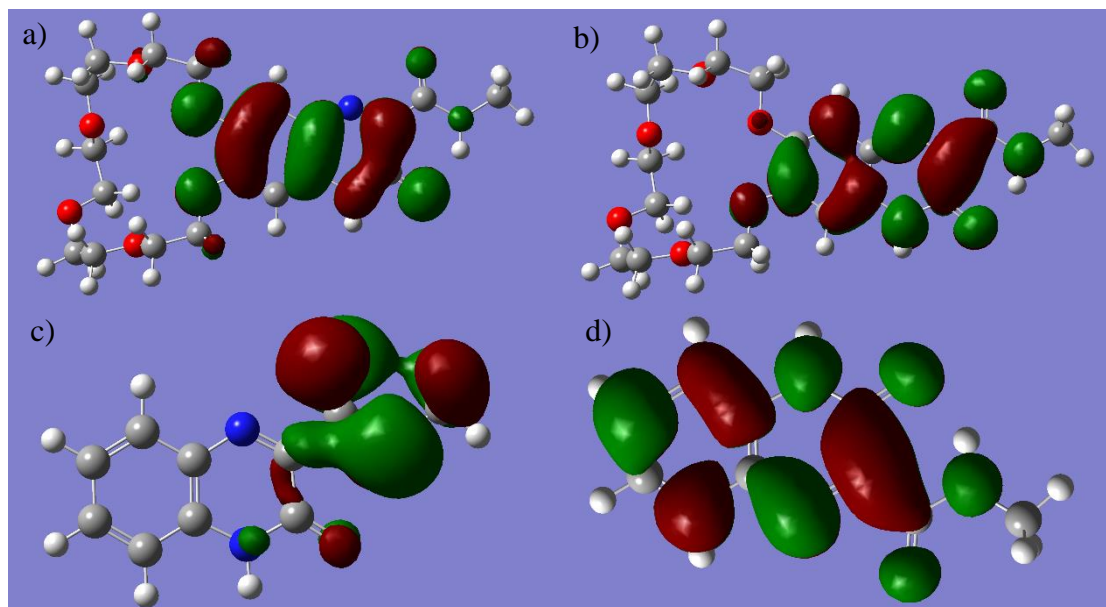

**Figure S6.** Frontier orbitals of **1** a) for HOMO, b) for LUMO and of **C1QXa** c) for HOMO, d) for LUMO based density functional theory (DFT) calculations using the B3LYP-6-31G (*d, p*) basis set in Gaussian 09W.

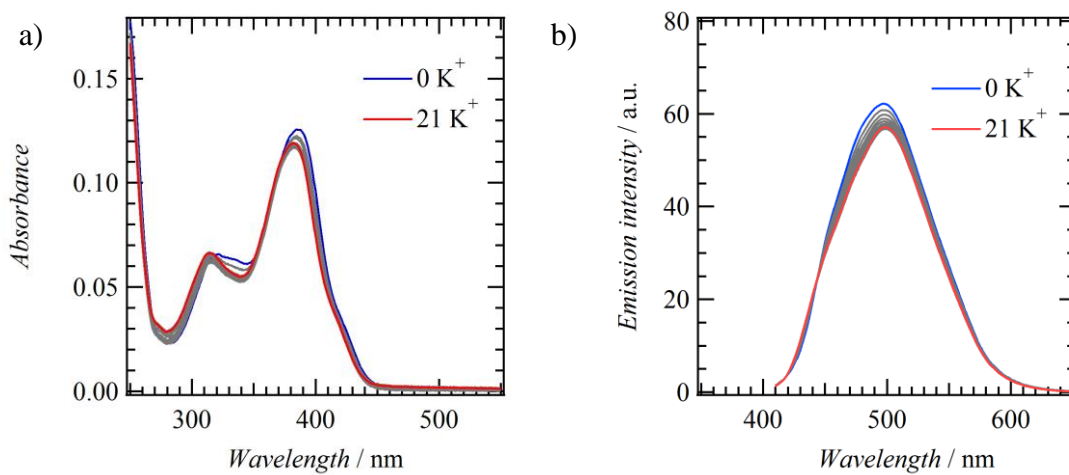

**Figure S7.**  $K^+$  titration spectra of **1** in  $CH_3CN$ . a) Absorption and b) fluorescence spectra by the addition of 21 equivalents of  $K^+$  in  $CH_3CN$ .

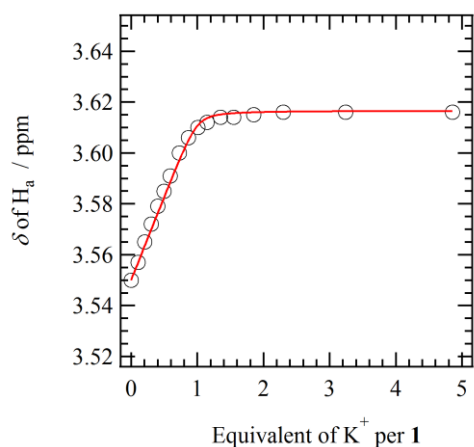

**Figure S8.**  $^1\text{H}$  NMR titration spectra of **1** (2.0 mM) in  $\text{CD}_3\text{CN}$  using  $\text{K}^+\cdot\text{PF}_6^-$ . Plots of chemical shift of  $\text{H}_a$  and titration amount of  $\text{K}^+$  ion per **1**. Red line was a fitting curve of 1:1 complex formation between **1** and  $\text{K}^+$  ion.

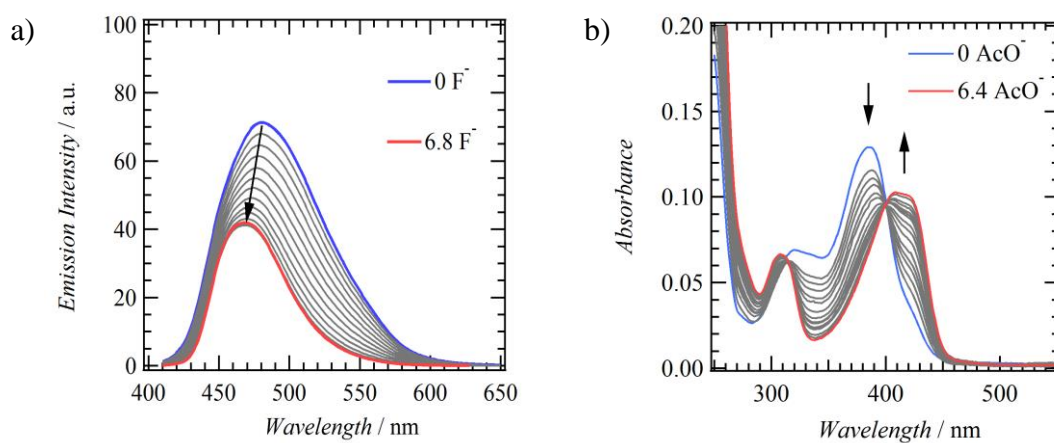

**Figure S9.** Titration spectra of **1** using a) 6.8 equivalent of  $\text{F}^-$  at fluorescence spectra and b) 6.4 equivalent of  $\text{AcO}^-$  anions at UV-vis spectra in  $\text{CH}_3\text{CN}$ . The excitation wavelength was fixed at 399 nm.

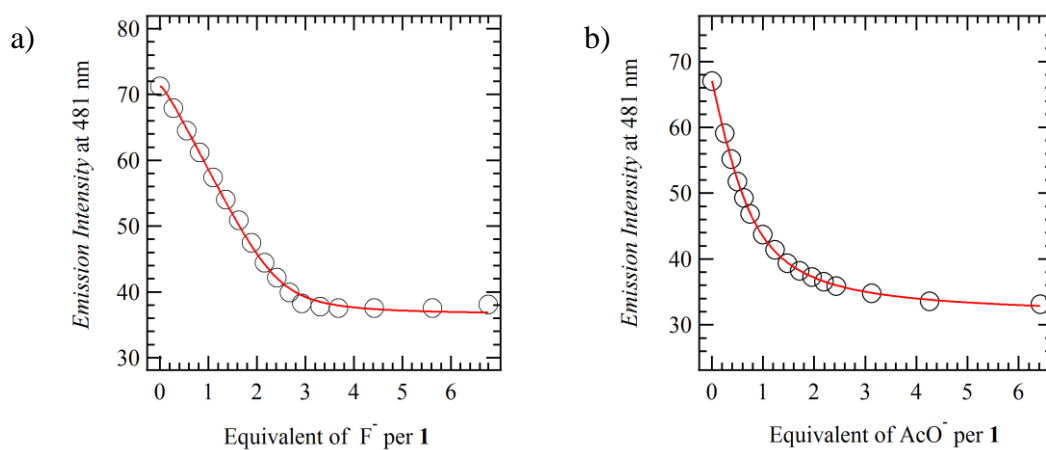

**Figure S10.** Fitting curves of two steps a)  $F^-$  and b)  $AcO^-$  recognitions processes using the fluorescence titration spectra of **1**.

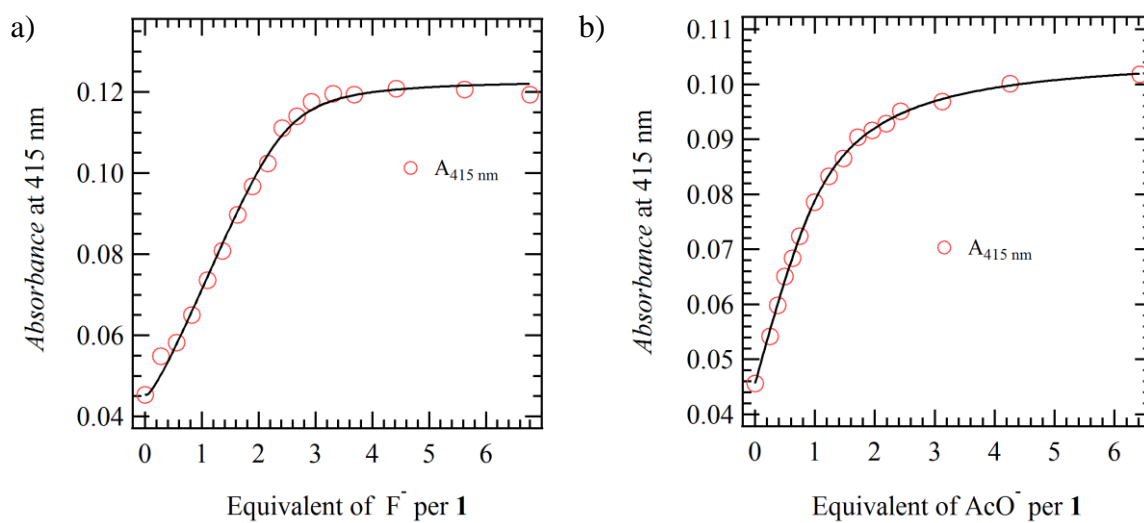

**Figure S11.** Fitting curves of two steps a)  $F^-$  and b)  $AcO^-$  recognitions processes using the UV-vis titration spectra at 415 nm of **1**.

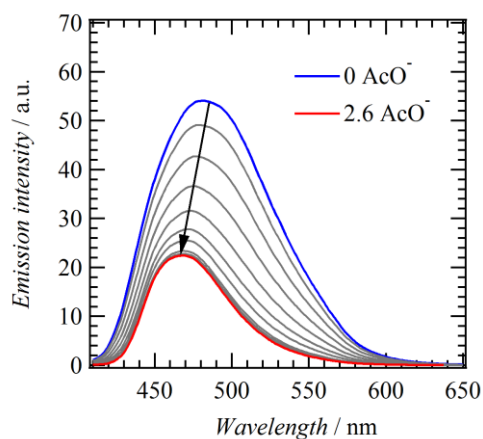

**Figure S12.** Fluorescence titration spectra of  $K^+\cdot\mathbf{1}$  by the addition of 2.6 equivalent of  $AcO^-$  anion.

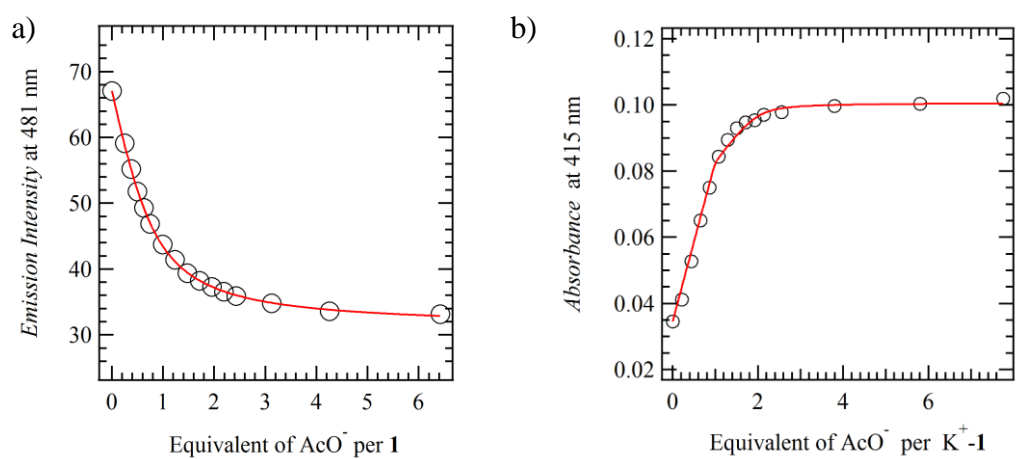

**Figure S13.** Fitting curve of the two-step  $AcO^-$  anion recognition processes of  $K^+\cdot\mathbf{1}$  in  $CH_3CN$ .

Titration data of a) fluorescence band at 481 nm and b) UV-vis band at 415 nm.



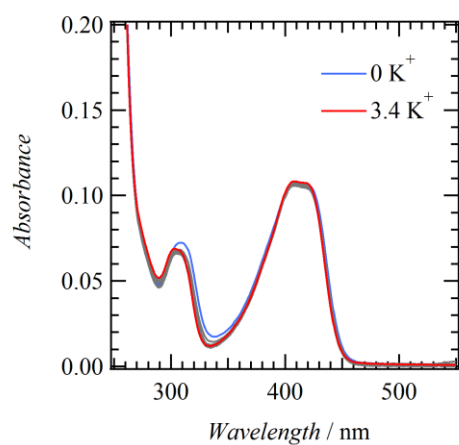

**Figure S14.** UV-vis spectra of **1<sup>-</sup>** anion by the addition of 3.4 equivalent of K<sup>+</sup>.

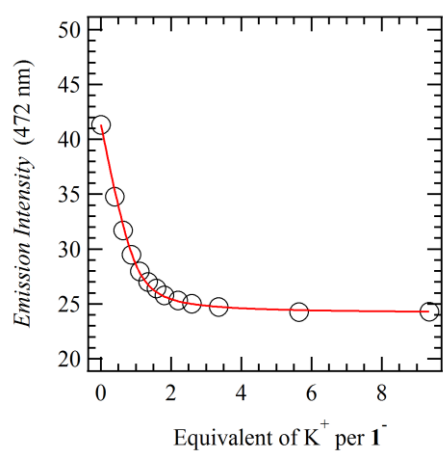

**Figure S15.** Fitting curve of K<sup>+</sup> recognition process of anionic **1<sup>-</sup>** at the fluorescence spectra using the 1:1 complex formation model.

### Determination of complex formation constants.

Titration data were fitted by non-linear regression analyses using the global fitting program of Igor Pro 5.03J. The two steps complex formation model in the equations (1), (2), and (3) is applied to determine the  $K_1$  and  $K_2$  values from the optical titration data.

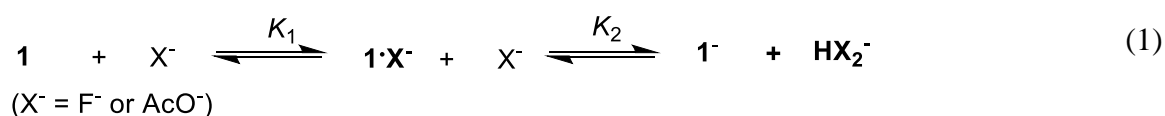

$$K_1 = \frac{[1 \cdot X^-]}{[1][X^-]} \quad (2)$$

$$K_2 = \frac{[1^-][\text{H}^+X^-]}{[1 \cdot X^-]} \quad (3)$$

Absorbance (A) and Fluorescence intensity (F) are represented by equations(4) and (5), respectively.

$$\mathbf{A} = \frac{\varepsilon_{\text{LH}^+} + \varepsilon_{\text{LH} \cdot \text{X}} K_1 [\text{X}] + \varepsilon_{\text{L}} K_1 K_2 [\text{X}]}{1 + K_1 [\text{X}] + K_1 K_2 [\text{X}]^2} \quad (4)$$

$$\mathbf{F} = \frac{k_{\text{LH}^+} + k_{\text{LH} \cdot \text{X}} K_1 [\text{X}] + k_{\text{L}} K_1 K_2 [\text{X}]}{1 + K_1 [\text{X}] + K_1 K_2 [\text{X}]^2} \quad (5),$$

where the constant  $k$  is corresponding to a proportionality factor  $F = k [c]$  in fluorescence spectra.

The  $[\text{X}]$  is a solution of three order equation (6),

$$A[\text{X}]^3 + B[\text{X}]^2 + C[\text{X}] + D = 0 \quad (6),$$

$$A = K_1 K_2, \quad B = K_1 + 2K_1 K_2 [\text{LH}]_t - K_1 K_2 [\text{X}]_t$$

$$C = 1 + K_1[H]_t - K_1[X]_t, \quad D = -[X]_t$$

The binding constants of  $K_1$  and  $K_2$  were obtained by the fitting procedure of equations (4) and (5), where the unknown parameters of  $\varepsilon_{LH \cdot X}$ ,  $\varepsilon_L$ ,  $k_{LH \cdot X}$ , and  $k_L$  are also determined by the regression analysis. Newton method is used in the regression program of equation (6).
